# Supplementary material
Source: PubMed Central journal article supplement (PMC7182071)
Supplement: NIHMS1500953-supplement-2.pdf [file NIHMS1500953-supplement-2.pdf]

| <b>Gene</b>    | <b>Forward</b>                | <b>Reverse</b>                    |
|----------------|-------------------------------|-----------------------------------|
| $\alpha$ -SMA  | TAGCACCCAGCACCATGAAGAT        | GAAGCATTGCGGTGGACAATG             |
| $\beta$ -Actin | TGGGCCGCTCTAGGCACCA           | CGGTTGGCCTTAGGGTTCAGG             |
| AURA           | GTGTGCCTTAACCTCCCTATTC        | CGAACCTTGCCTCCAGATTAT             |
| CGA            | CTCCCTGTGAACAGCCCTA           | TGTGTCGGAGATGACCTCAA              |
| CGB            | TTCCATGCCAGTGGATAACA          | GAGAGGACCTCAATGATGCA              |
| Cox-2          | ATCATTACCCAGGCAAATTGC         | GGCTTCAGCATAAAGCGTTTG             |
| ENO2           | AGTGGACCACATCAACTCCA          | TGTCCAGTTTCTCTTGCTCCA             |
| FAP            | ATCTATGACCTTAGCAATGGAGAATTTGT | GTTTTGATAGACATATGCTAATTTACTCCCAAC |
| FGF-7          | CTCAACGGCAAGTTTCCCTCCCTTTTC   | GCCTTCCAGGATTTGCTGGCCC            |
| FOXA2          | GGCCAGAGTTCCACAAATCTA         | CCCTCCCTCCTTCTTGAATAAT            |
| GAPDH          | CGCTCTCTGCTCCTCCTGTT          | CCATGGTGTCTGAGCGATGT              |
| IL-6           | GGTACATCCTCGACGGCATCT         | GTGCCTCTTTGCTGCTTTTAC             |
| MMP-1          | CAGAGATGAAGTCCGGTTTTTC        | GGGGTATCCGTGTAGCACAT              |
| MMP-3          | CAAAACATATTTCTTTGTAGAGGACAA   | TTCAGCTATTTGCTTGGGAA              |
| MMP-9          | GAACCAATCTCACCGACAGG          | GCCACCCGAGTGTAACCATA              |
| MYCN           | AGTACCTCCGGAGAGGACAC          | GGAACGCCGCTTCTCCA                 |
| NGN-3          | CTGTGGGTGCTAAGGGTAAG          | GGGAGAAGCAGAAGGAACAA              |
| NKX2.2         | AAACCGTCCCAGCGTTAAT           | CGGCTGACAATATCGCTACTC             |
| PSA            | GAGGCTGGGAGTGCAGAGAAG         | TTGTTCTGATGCAGTGGGC               |
| SCG3           | CCAGGCAGTAAGGTAGAAATAGAG      | GCAGGGACCTGAAGTTCATTA             |
| SFRP1          | ATCTCTGTGCCAGCGAGTTT          | GGCTTCTTCTTCTTGGGGAC              |
| TNC            | AGCATCACCTGGAATGGAGGA         | TGTGGCTTGTGGCTCTTTGGA             |

**Table S1: List of primers used for qRT-PCR. Listed as 5' to 3'. Category headings of the columns are listed in bold.**
